# Supplementary material
Source: publisher figshare collection journal article supplement (https://acs.figshare.com/ndownloader/files/4015108)
Supplement: Supplementary file 1 [file 4015108]

## Supporting Information for Publication

### Determination of the midgap state energy levels of anatase TiO<sub>2</sub> nanocrystal film by nanosecond transient IR absorption – excitation energy scanning spectra

Ming Zhu, Yang Mi, Gangbei Zhu, Deyong Li, Yunpeng Wang, Yuxiang Weng\*

The Key Laboratory of Softmatter Physics, The Institute of Physics, Chinese Academy of Science, Beijing 100190, China

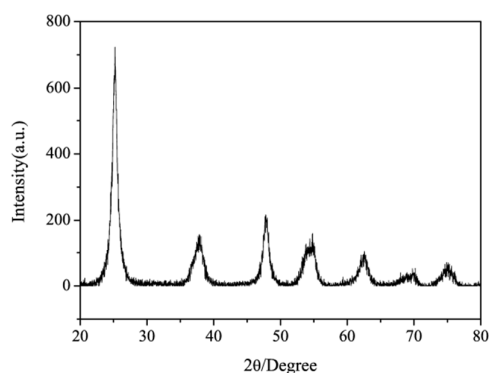

**Figure S1.** X-ray diffraction (XRD) pattern of TiO<sub>2</sub> powder. X-ray diffraction (XRD) patterns were recorded on a diffractometer (Rigaku D/max-2500, Japan) using CuK $\alpha$  radiation at 45 kV and 250 mA and scan rate of 0.15° 2 $\theta$  per second. The pattern exhibits intense diffraction peaks at 2 $\theta$ =25.22°, 37.88°, 47.80°, 54.79°, 62.58°, 69.95° and 75.07°, all peaks are in good agreement with the standard spectrum of anatase TiO<sub>2</sub> (JCPDS 21-1272), corresponding to the diffractions from the (101), (004), (200), (211), (204), (220), (215) crystal planes of anatase TiO<sub>2</sub> respectively, indicating TiO<sub>2</sub> in the anatase phase. The nanocrystal size was calculated to be 7.9 nm by Scherrer equation  $D = K\lambda/B\cos\theta$ , where  $D$  accounts for the average crystal size,  $K = 0.89$  is the Scherrer coefficient,  $\lambda$  is the wavelength of the X-ray radiation ( $\lambda=0.15406$  nm),  $B$  is the full width at half-maximum (FWHM) and  $\theta$  is the diffraction angle (Zachariah, A.; Baiju, K.V.; Shukla, S.; Deepa, K. S.; James, J.; Warriar, K. G. K. *J. Phys. Chem. C*, **2008** 112, 11345–11356).
